# Supplementary material
Source: publisher figshare collection journal article supplement (https://acs.figshare.com/ndownloader/files/4579108)
Supplement: Supplementary file 1 [file 4579108]

############################################################# 
# ***Indian Association for the Cultivation of Science*** 
# 
# this structure was solved by Raju Mondal on 2/3/2008 
############################################################# 
 
data_rm17_0m 

_publ_contact_author        
;
Dr. Raju Mondal 
;      
_publ_author_address     
;
    Dr. Raju Mondal
     Department of Inorganic Chemistry
     Indian Association for the Cultivation of Science
      Raja S. C. Mullick Road
         Jadavpur
         Kolkata 700 078
          India

;
_publ_requested_journal           'Crystal Growth & Design'  

_publ_contact_author_email       
;
 icrm@iacs.res.in
 
;

_publ_author_name
;
'Raju Mondal'
'Dipali Sadhukhan'
'Tanmoy Chatterjee' 
'Manas Kumar Bhunia'

;
_journal_name_full                'Crystal Growth & Design'
   
 
_audit_creation_method            SHELXL-97 
_chemical_name_systematic 
; 
 ? 
; 
_chemical_name_common             ? 
_chemical_melting_point           ? 
_chemical_formula_moiety          ? 
_chemical_formula_sum 
 'C30 H32 F12 N8 O8 Zn2' 
_chemical_formula_weight          991.38 
 
loop_ 
 _atom_type_symbol 
 _atom_type_description 
 _atom_type_scat_dispersion_real 
 _atom_type_scat_dispersion_imag 
 _atom_type_scat_source 
 'C'  'C'   0.0033   0.0016 
 'International Tables Vol C Tables 4.2.6.8 and 6.1.1.4' 
 'H'  'H'   0.0000   0.0000 
 'International Tables Vol C Tables 4.2.6.8 and 6.1.1.4' 
 'N'  'N'   0.0061   0.0033 
 'International Tables Vol C Tables 4.2.6.8 and 6.1.1.4' 
 'F'  'F'   0.0171   0.0103 
 'International Tables Vol C Tables 4.2.6.8 and 6.1.1.4' 
 'Zn'  'Zn'   0.2839   1.4301 
 'International Tables Vol C Tables 4.2.6.8 and 6.1.1.4' 
 'O'  'O'   0.0106   0.0060 
 'International Tables Vol C Tables 4.2.6.8 and 6.1.1.4' 
 
_symmetry_cell_setting            Monoclinic 
_symmetry_space_group_name_H-M    P2(1)/n 
 
loop_ 
 _symmetry_equiv_pos_as_xyz 
 'x, y, z' 
 '-x+1/2, y+1/2, -z+1/2' 
 '-x, -y, -z' 
 'x-1/2, -y-1/2, z-1/2' 
 
_cell_length_a                    8.57420(10) 
_cell_length_b                    14.5932(2) 
_cell_length_c                    15.0547(2) 
_cell_angle_alpha                 90.00 
_cell_angle_beta                  91.2880(10) 
_cell_angle_gamma                 90.00 
_cell_volume                      1883.24(4) 
_cell_formula_units_Z             2 
_cell_measurement_temperature     120(2) 
_cell_measurement_reflns_used     9256 
_cell_measurement_theta_min       2.69 
_cell_measurement_theta_max       30.01 
 
_exptl_crystal_description        Cube 
_exptl_crystal_colour             Colourless 
_exptl_crystal_size_max           0.22 
_exptl_crystal_size_mid           0.22
_exptl_crystal_size_min           0.16 
_exptl_crystal_density_meas       'not measured' 
_exptl_crystal_density_diffrn     1.748 
_exptl_crystal_density_method     'not measured' 
_exptl_crystal_F_000              1000 
_exptl_absorpt_coefficient_mu     1.393 
_exptl_absorpt_correction_type    multi-scan
_exptl_absorpt_correction_T_min   0.890863
_exptl_absorpt_correction_T_max   1.0000
_exptl_absorpt_process_details    
'SADABS v.2.03 (Bruker, 2001), R(int)=0.0414 before correction'    
 
_exptl_special_details 
; 
 ? 
; 
 
_diffrn_ambient_temperature       120(2) 
_diffrn_radiation_wavelength      0.71073 
_diffrn_radiation_type            MoK\a 
_diffrn_radiation_source          'fine-focus sealed tube' 
_diffrn_radiation_monochromator   graphite 
_diffrn_measurement_device_type   'Bruker APEX-2 CCD area detector'  
_diffrn_measurement_method        '/w scans' 
_diffrn_detector_area_resol_mean  8 
_diffrn_standards_decay_%         0 
_diffrn_reflns_number             35488 
_diffrn_reflns_av_R_equivalents   0.0363 
_diffrn_reflns_av_sigmaI/netI     0.0348 
_diffrn_reflns_limit_h_min        -13 
_diffrn_reflns_limit_h_max        13 
_diffrn_reflns_limit_k_min        -22 
_diffrn_reflns_limit_k_max        18 
_diffrn_reflns_limit_l_min        -23 
_diffrn_reflns_limit_l_max        23 
_diffrn_reflns_theta_min          1.94 
_diffrn_reflns_theta_max          33.58 
_reflns_number_total              7396 
_reflns_number_gt                 5759 
_reflns_threshold_expression      I>2\s(I)
 
_computing_data_collection        'Bruker SMART'
_computing_cell_refinement        'Bruker SMART'
_computing_data_reduction         'Bruker SHELXTL'
_computing_structure_solution     'SHELXS-97 (Sheldrick, 1990)' 
_computing_structure_refinement   'SHELXL-97 (Sheldrick, 1997)' 
_computing_molecular_graphics     'Bruker SHELXTL'
_computing_publication_material   'Bruker SHELXTL'
 
_refine_special_details 
; 
 Refinement of F^2^ against ALL reflections.  The weighted R-factor wR and 
 goodness of fit S are based on F^2^, conventional R-factors R are based 
 on F, with F set to zero for negative F^2^. The threshold expression of 
 F^2^ > 2sigma(F^2^) is used only for calculating R-factors(gt) etc. and is 
 not relevant to the choice of reflections for refinement.  R-factors based 
 on F^2^ are statistically about twice as large as those based on F, and R- 
 factors based on ALL data will be even larger. 
; 
 
_refine_ls_structure_factor_coef  Fsqd  
_refine_ls_matrix_type            full 
_refine_ls_weighting_scheme       calc  
_refine_ls_weighting_details 
 'calc w=1/[\s^2^(Fo^2^)+(0.0489P)^2^+0.4469P] where P=(Fo^2^+2Fc^2^)/3' 
_atom_sites_solution_primary      direct 
_atom_sites_solution_secondary    difmap 
_atom_sites_solution_hydrogens    geom 
_refine_ls_hydrogen_treatment     refall 
_refine_ls_extinction_method      none 
_refine_ls_extinction_coef        ? 
_refine_ls_number_reflns          7396 
_refine_ls_number_parameters      335 
_refine_ls_number_restraints      0 
_refine_ls_R_factor_all           0.0527 
_refine_ls_R_factor_gt            0.0359 
_refine_ls_wR_factor_ref          0.0966 
_refine_ls_wR_factor_gt           0.0891 
_refine_ls_goodness_of_fit_ref    1.054 
_refine_ls_restrained_S_all       1.054 
_refine_ls_shift/su_max           0.001 
_refine_ls_shift/su_mean          0.000 
 
loop_ 
 _atom_site_label 
 _atom_site_type_symbol 
 _atom_site_fract_x 
 _atom_site_fract_y 
 _atom_site_fract_z 
 _atom_site_U_iso_or_equiv 
 _atom_site_adp_type 
 _atom_site_occupancy 
 _atom_site_symmetry_multiplicity 
 _atom_site_calc_flag 
 _atom_site_refinement_flags 
 _atom_site_disorder_assembly 
 _atom_site_disorder_group 
Zn1 Zn 0.69206(2) 0.074402(11) 0.240727(11) 0.01622(6) Uani 1 1 d . . . 
N2 N 0.86907(15) -0.08069(9) 0.17448(9) 0.0174(2) Uani 1 1 d . . . 
F3 F 0.77052(13) -0.16270(8) 0.49962(7) 0.0322(2) Uani 1 1 d . . . 
O1 O 0.64914(14) 0.00076(8) 0.34600(8) 0.0226(2) Uani 1 1 d . . . 
O2 O 0.87077(14) -0.08167(9) 0.35542(8) 0.0271(3) Uani 1 1 d . . . 
F6 F 1.11151(13) 0.31709(8) 0.21082(8) 0.0341(2) Uani 1 1 d . . . 
O3 O 0.85259(15) 0.15747(9) 0.28827(8) 0.0286(3) Uani 1 1 d . . . 
C2 C 0.85659(16) -0.08935(10) 0.02901(9) 0.0150(2) Uani 1 1 d . . . 
F2 F 0.54445(13) -0.10293(9) 0.47885(8) 0.0376(3) Uani 1 1 d . . . 
C3 C 0.77909(16) -0.01049(10) 0.05871(10) 0.0157(3) Uani 1 1 d . . . 
C9 C 0.7018(2) 0.06349(11) 0.00537(12) 0.0226(3) Uani 1 1 d . . . 
N1 N 0.78693(14) -0.00618(8) 0.14752(8) 0.0162(2) Uani 1 1 d . . . 
C1 C 0.91231(17) -0.13236(10) 0.10543(10) 0.0172(3) Uani 1 1 d . . . 
C7 C 0.87380(17) -0.12160(11) -0.06543(10) 0.0176(3) Uani 1 1 d . . . 
C14 C 0.89098(18) 0.22319(11) 0.23935(11) 0.0204(3) Uani 1 1 d . . . 
C13 C 0.6957(2) -0.08627(12) 0.47475(11) 0.0248(3) Uani 1 1 d . . . 
C12 C 0.74540(18) -0.05384(11) 0.38229(10) 0.0192(3) Uani 1 1 d . . . 
C8 C 1.0019(2) -0.21894(12) 0.11941(12) 0.0246(3) Uani 1 1 d . . . 
F1 F 0.73058(17) -0.02207(9) 0.53493(8) 0.0438(3) Uani 1 1 d . . . 
F4 F 0.98493(14) 0.34386(9) 0.32955(9) 0.0422(3) Uani 1 1 d . . . 
F5 F 1.13323(14) 0.22567(10) 0.32082(10) 0.0492(3) Uani 1 1 d . . . 
O4 O 0.83121(16) 0.24848(10) 0.16968(10) 0.0361(3) Uani 1 1 d . . . 
C15 C 1.0328(2) 0.27731(12) 0.27540(12) 0.0255(3) Uani 1 1 d . . . 
H7B H 0.939(2) -0.1723(13) -0.0647(12) 0.016(4) Uiso 1 1 d . . . 
H222 H 0.880(2) -0.0870(13) 0.2267(15) 0.018(5) Uiso 1 1 d . . . 
H7A H 0.926(3) -0.0734(14) -0.0988(15) 0.025(5) Uiso 1 1 d . . . 
H8C H 1.050(3) -0.2191(18) 0.1749(19) 0.051(7) Uiso 1 1 d . . . 
H8B H 1.080(3) -0.2250(18) 0.0772(17) 0.044(7) Uiso 1 1 d . . . 
H9C H 0.731(4) 0.068(2) -0.044(2) 0.067(10) Uiso 1 1 d . . . 
H9B H 0.596(4) 0.060(2) 0.002(2) 0.077(10) Uiso 1 1 d . . . 
H9A H 0.728(4) 0.121(2) 0.032(2) 0.063(9) Uiso 1 1 d . . . 
H8A H 0.928(3) -0.2675(19) 0.1156(17) 0.048(7) Uiso 1 1 d . . . 
N3 N 0.50094(15) -0.13638(8) -0.19389(8) 0.0174(2) Uani 1 1 d . . . 
C4 C 0.62186(17) -0.21744(10) -0.08689(10) 0.0172(3) Uani 1 1 d . . . 
C5 C 0.71957(16) -0.14538(10) -0.10927(9) 0.0160(3) Uani 1 1 d . . . 
C6 C 0.64190(17) -0.09827(10) -0.17755(10) 0.0170(3) Uani 1 1 d . . . 
N4 N 0.49262(15) -0.20976(9) -0.13822(9) 0.0180(2) Uani 1 1 d . . . 
C11 C 0.7001(2) -0.02143(12) -0.23344(12) 0.0231(3) Uani 1 1 d . . . 
C10 C 0.6460(2) -0.29383(12) -0.02277(12) 0.0240(3) Uani 1 1 d . . . 
H444 H 0.413(3) -0.2418(14) -0.1403(14) 0.024(5) Uiso 1 1 d . . . 
H10C H 0.744(3) -0.3174(17) -0.0258(16) 0.038(6) Uiso 1 1 d . . . 
H11C H 0.628(3) -0.0034(17) -0.2747(17) 0.040(6) Uiso 1 1 d . . . 
H11B H 0.791(3) -0.0381(17) -0.2647(17) 0.038(6) Uiso 1 1 d . . . 
H10B H 0.584(3) -0.3464(18) -0.0366(17) 0.046(7) Uiso 1 1 d . . . 
H11A H 0.742(3) 0.0262(17) -0.2033(16) 0.037(6) Uiso 1 1 d . . . 
H10A H 0.631(4) -0.277(2) 0.034(2) 0.064(9) Uiso 1 1 d . . . 
 
loop_ 
 _atom_site_aniso_label 
 _atom_site_aniso_U_11 
 _atom_site_aniso_U_22 
 _atom_site_aniso_U_33 
 _atom_site_aniso_U_23 
 _atom_site_aniso_U_13 
 _atom_site_aniso_U_12 
Zn1 0.01812(9) 0.01525(9) 0.01515(9) -0.00005(6) -0.00256(6) 0.00129(6) 
N2 0.0178(6) 0.0196(6) 0.0146(6) 0.0016(5) -0.0011(4) 0.0041(4) 
F3 0.0336(6) 0.0335(6) 0.0297(5) 0.0172(4) 0.0036(4) 0.0093(4) 
O1 0.0238(5) 0.0239(5) 0.0202(5) 0.0068(4) -0.0004(4) 0.0034(4) 
O2 0.0222(6) 0.0403(7) 0.0188(5) 0.0065(5) 0.0010(4) 0.0066(5) 
F6 0.0321(6) 0.0313(5) 0.0394(6) -0.0066(5) 0.0108(5) -0.0103(5) 
O3 0.0336(6) 0.0260(6) 0.0259(6) 0.0022(5) -0.0080(5) -0.0099(5) 
C2 0.0134(6) 0.0165(6) 0.0153(6) -0.0005(5) -0.0006(5) -0.0012(5) 
F2 0.0267(5) 0.0459(6) 0.0409(6) 0.0196(5) 0.0120(5) 0.0062(5) 
C3 0.0139(6) 0.0160(6) 0.0172(6) 0.0001(5) -0.0013(5) -0.0007(5) 
C9 0.0284(8) 0.0197(7) 0.0196(7) 0.0023(6) -0.0022(6) 0.0051(6) 
N1 0.0164(5) 0.0162(5) 0.0161(5) 0.0009(4) -0.0013(4) 0.0016(4) 
C1 0.0149(6) 0.0179(6) 0.0187(6) 0.0003(5) 0.0004(5) 0.0008(5) 
C7 0.0149(6) 0.0217(7) 0.0163(6) -0.0017(5) 0.0007(5) 0.0012(5) 
C14 0.0193(7) 0.0178(7) 0.0242(7) -0.0039(6) 0.0001(6) 0.0008(5) 
C13 0.0273(8) 0.0268(8) 0.0205(7) 0.0053(6) 0.0028(6) 0.0050(6) 
C12 0.0207(7) 0.0207(7) 0.0161(6) 0.0020(5) -0.0015(5) -0.0018(5) 
C8 0.0264(8) 0.0228(8) 0.0246(8) 0.0034(6) 0.0016(6) 0.0097(6) 
F1 0.0691(9) 0.0422(7) 0.0201(5) -0.0050(5) 0.0005(5) 0.0007(6) 
F4 0.0391(6) 0.0434(7) 0.0446(7) -0.0266(6) 0.0116(5) -0.0131(5) 
F5 0.0302(6) 0.0493(7) 0.0669(9) 0.0135(7) -0.0238(6) -0.0069(5) 
O4 0.0280(6) 0.0424(8) 0.0376(7) 0.0140(6) -0.0094(5) -0.0086(6) 
C15 0.0227(7) 0.0244(8) 0.0292(8) -0.0047(6) -0.0005(6) -0.0018(6) 
N3 0.0190(6) 0.0157(5) 0.0173(6) -0.0013(4) -0.0029(5) 0.0026(4) 
C4 0.0178(6) 0.0181(6) 0.0157(6) -0.0020(5) -0.0015(5) 0.0018(5) 
C5 0.0159(6) 0.0169(6) 0.0152(6) -0.0022(5) -0.0006(5) 0.0025(5) 
C6 0.0191(6) 0.0170(6) 0.0149(6) -0.0029(5) -0.0004(5) 0.0016(5) 
N4 0.0175(6) 0.0160(6) 0.0205(6) -0.0003(5) -0.0024(5) -0.0004(5) 
C11 0.0264(8) 0.0200(7) 0.0227(7) 0.0036(6) -0.0020(6) -0.0009(6) 
C10 0.0234(8) 0.0233(8) 0.0250(8) 0.0071(6) -0.0047(6) -0.0008(6) 
 
_geom_special_details 
; 
 All esds (except the esd in the dihedral angle between two l.s. planes) 
 are estimated using the full covariance matrix.  The cell esds are taken 
 into account individually in the estimation of esds in distances, angles 
 and torsion angles; correlations between esds in cell parameters are only 
 used when they are defined by crystal symmetry.  An approximate (isotropic) 
 treatment of cell esds is used for estimating esds involving l.s. planes. 
; 
 
loop_ 
 _geom_bond_atom_site_label_1 
 _geom_bond_atom_site_label_2 
 _geom_bond_distance 
 _geom_bond_site_symmetry_2 
 _geom_bond_publ_flag 
Zn1 O1 1.9567(11) . ? 
Zn1 O3 1.9575(12) . ? 
Zn1 N3 2.0003(13) 3_655 ? 
Zn1 N1 2.0161(12) . ? 
N2 C1 1.3432(19) . ? 
N2 N1 1.3528(17) . ? 
N2 H222 0.80(2) . ? 
F3 C13 1.3359(19) . ? 
O1 C12 1.2627(19) . ? 
O2 C12 1.226(2) . ? 
F6 C15 1.329(2) . ? 
O3 C14 1.257(2) . ? 
C2 C1 1.386(2) . ? 
C2 C3 1.407(2) . ? 
C2 C7 1.508(2) . ? 
F2 C13 1.322(2) . ? 
C3 N1 1.3387(19) . ? 
C3 C9 1.492(2) . ? 
C9 H9C 0.79(3) . ? 
C9 H9B 0.91(4) . ? 
C9 H9A 0.95(3) . ? 
C1 C8 1.491(2) . ? 
C7 C5 1.505(2) . ? 
C7 H7B 0.928(19) . ? 
C7 H7A 0.98(2) . ? 
C14 O4 1.214(2) . ? 
C14 C15 1.538(2) . ? 
C13 F1 1.333(2) . ? 
C13 C12 1.539(2) . ? 
C8 H8C 0.92(3) . ? 
C8 H8B 0.94(3) . ? 
C8 H8A 0.95(3) . ? 
F4 C15 1.338(2) . ? 
F5 C15 1.323(2) . ? 
N3 C6 1.348(2) . ? 
N3 N4 1.3627(18) . ? 
N3 Zn1 2.0003(13) 3_655 ? 
C4 N4 1.341(2) . ? 
C4 C5 1.391(2) . ? 
C4 C10 1.486(2) . ? 
C5 C6 1.394(2) . ? 
C6 C11 1.494(2) . ? 
N4 H444 0.83(2) . ? 
C11 H11C 0.91(3) . ? 
C11 H11B 0.95(2) . ? 
C11 H11A 0.90(2) . ? 
C10 H10C 0.91(2) . ? 
C10 H10B 0.95(3) . ? 
C10 H10A 0.90(3) . ? 
 
loop_ 
 _geom_angle_atom_site_label_1 
 _geom_angle_atom_site_label_2 
 _geom_angle_atom_site_label_3 
 _geom_angle 
 _geom_angle_site_symmetry_1 
 _geom_angle_site_symmetry_3 
 _geom_angle_publ_flag 
O1 Zn1 O3 100.81(5) . . ? 
O1 Zn1 N3 111.39(5) . 3_655 ? 
O3 Zn1 N3 114.72(5) . 3_655 ? 
O1 Zn1 N1 109.24(5) . . ? 
O3 Zn1 N1 108.92(5) . . ? 
N3 Zn1 N1 111.22(5) 3_655 . ? 
C1 N2 N1 111.70(13) . . ? 
C1 N2 H222 132.2(14) . . ? 
N1 N2 H222 116.0(14) . . ? 
C12 O1 Zn1 124.34(10) . . ? 
C14 O3 Zn1 116.70(11) . . ? 
C1 C2 C3 105.26(13) . . ? 
C1 C2 C7 127.01(13) . . ? 
C3 C2 C7 127.72(13) . . ? 
N1 C3 C2 110.02(13) . . ? 
N1 C3 C9 121.03(13) . . ? 
C2 C3 C9 128.91(14) . . ? 
C3 C9 H9C 115(2) . . ? 
C3 C9 H9B 115(2) . . ? 
H9C C9 H9B 107(3) . . ? 
C3 C9 H9A 108.1(18) . . ? 
H9C C9 H9A 104(3) . . ? 
H9B C9 H9A 107(3) . . ? 
C3 N1 N2 106.03(12) . . ? 
C3 N1 Zn1 135.27(10) . . ? 
N2 N1 Zn1 118.39(9) . . ? 
N2 C1 C2 106.99(13) . . ? 
N2 C1 C8 121.11(14) . . ? 
C2 C1 C8 131.90(14) . . ? 
C5 C7 C2 112.44(12) . . ? 
C5 C7 H7B 110.2(11) . . ? 
C2 C7 H7B 108.1(12) . . ? 
C5 C7 H7A 110.4(13) . . ? 
C2 C7 H7A 108.3(13) . . ? 
H7B C7 H7A 107.2(17) . . ? 
O4 C14 O3 128.80(16) . . ? 
O4 C14 C15 117.61(15) . . ? 
O3 C14 C15 113.59(14) . . ? 
F2 C13 F1 107.63(14) . . ? 
F2 C13 F3 107.38(14) . . ? 
F1 C13 F3 107.30(15) . . ? 
F2 C13 C12 112.98(14) . . ? 
F1 C13 C12 109.64(14) . . ? 
F3 C13 C12 111.66(13) . . ? 
O2 C12 O1 129.46(14) . . ? 
O2 C12 C13 117.33(14) . . ? 
O1 C12 C13 113.19(13) . . ? 
C1 C8 H8C 110.3(17) . . ? 
C1 C8 H8B 111.0(16) . . ? 
H8C C8 H8B 108(2) . . ? 
C1 C8 H8A 106.3(16) . . ? 
H8C C8 H8A 110(2) . . ? 
H8B C8 H8A 112(2) . . ? 
F5 C15 F6 106.92(14) . . ? 
F5 C15 F4 107.66(15) . . ? 
F6 C15 F4 107.23(14) . . ? 
F5 C15 C14 112.95(14) . . ? 
F6 C15 C14 112.12(14) . . ? 
F4 C15 C14 109.70(13) . . ? 
C6 N3 N4 105.73(12) . . ? 
C6 N3 Zn1 127.52(10) . 3_655 ? 
N4 N3 Zn1 121.18(10) . 3_655 ? 
N4 C4 C5 106.96(13) . . ? 
N4 C4 C10 122.56(14) . . ? 
C5 C4 C10 130.44(14) . . ? 
C4 C5 C6 105.73(13) . . ? 
C4 C5 C7 126.60(13) . . ? 
C6 C5 C7 127.61(13) . . ? 
N3 C6 C5 110.05(13) . . ? 
N3 C6 C11 121.07(14) . . ? 
C5 C6 C11 128.71(14) . . ? 
C4 N4 N3 111.47(13) . . ? 
C4 N4 H444 130.2(15) . . ? 
N3 N4 H444 118.4(15) . . ? 
C6 C11 H11C 111.9(16) . . ? 
C6 C11 H11B 112.0(15) . . ? 
H11C C11 H11B 107(2) . . ? 
C6 C11 H11A 115.5(15) . . ? 
H11C C11 H11A 112(2) . . ? 
H11B C11 H11A 97(2) . . ? 
C4 C10 H10C 111.5(15) . . ? 
C4 C10 H10B 113.2(16) . . ? 
H10C C10 H10B 101(2) . . ? 
C4 C10 H10A 113(2) . . ? 
H10C C10 H10A 108(2) . . ? 
H10B C10 H10A 110(2) . . ? 
 
_diffrn_measured_fraction_theta_max    0.995 
_diffrn_reflns_theta_full              33.58 
_diffrn_measured_fraction_theta_full   0.995 
_refine_diff_density_max    0.585 
_refine_diff_density_min   -0.462 
_refine_diff_density_rms    0.083 
